# Supplementary material
Source: publisher figshare collection journal article supplement (https://aacr.figshare.com/articles/dataset/_/22651572)
Supplement: Supplementary file 1 [file 40209225]

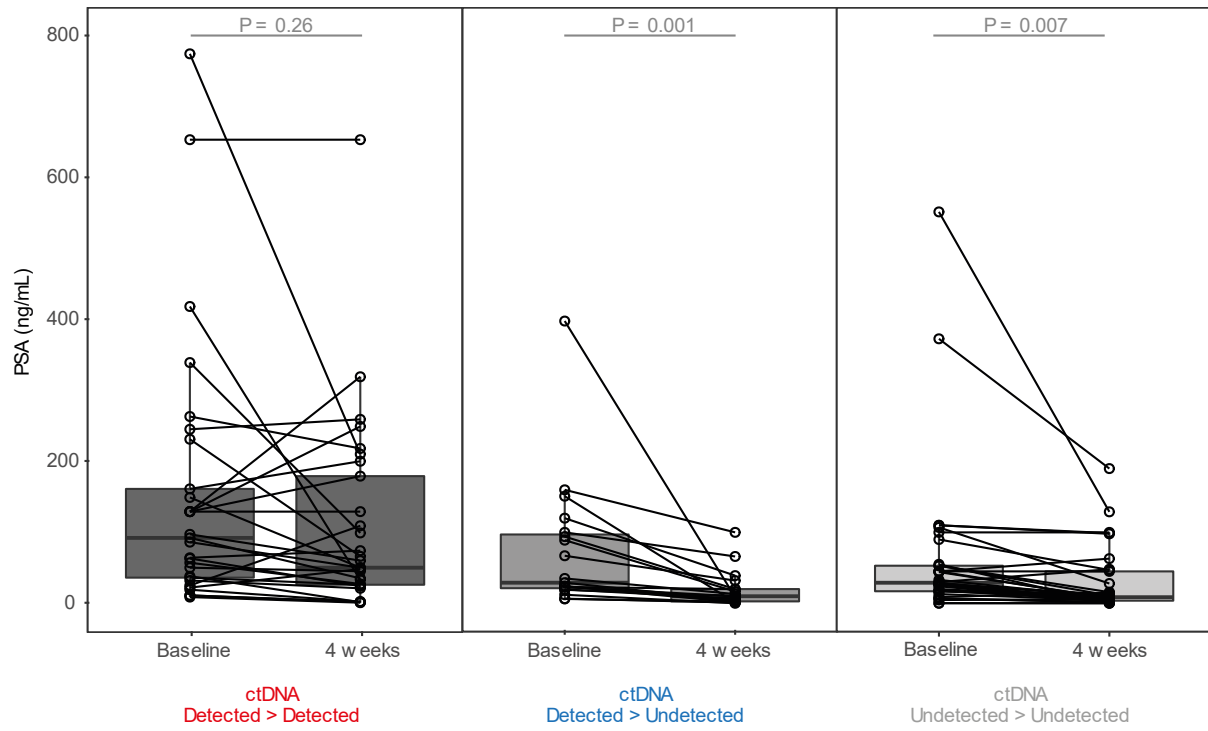

**Supplementary Figure S9:** Changes in PSA levels between baseline and 4 weeks on-treatment in the different ctDNA kinetics groups.
